# Supplementary material
Source: Springer Nature journal article supplement (https://www.springermedizin.de/resource/supplementary/12883_2013_1156_MOESM3_ESM.pdf/9456000)

# TAP: HC vs. NF1

■ Controls  
□ NF1

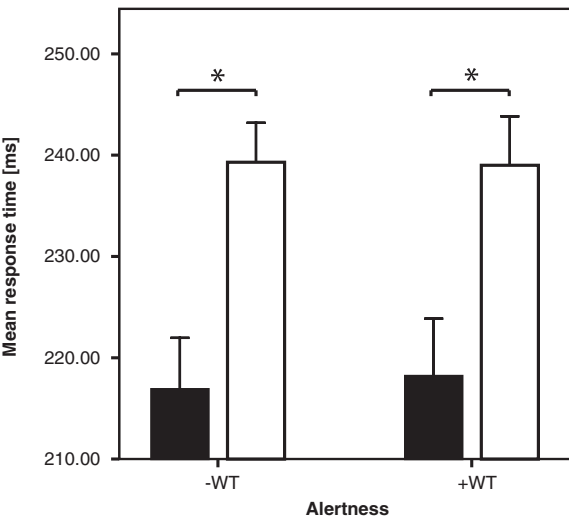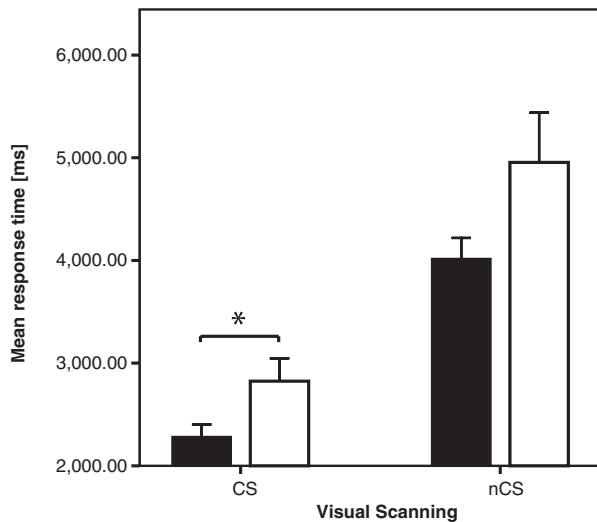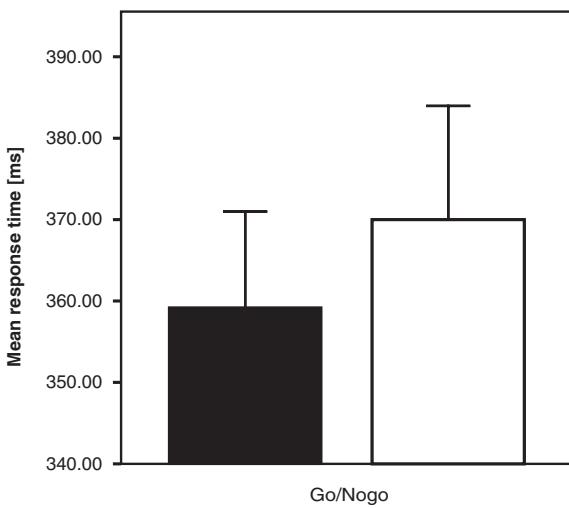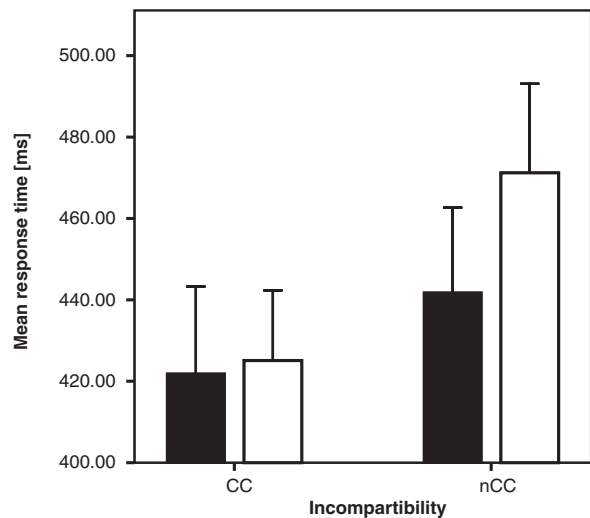

Supplement: MOESM3 [file 9456000]
